# Supplementary material for: Acceptability and Feasibility of Implementing Accelorometry-Based Activity Monitors and a Linked Web Portal in an Exercise Referral Scheme: Feasibility Randomized Controlled Trial
Source: PubMed Central journal article supplement (PMC6460312; doi:10.2196/12374), 2019-03-29

Screenshots of the MyWellnessCloud web platform.

**WEEKLY ACTIVITY LEVEL**  
Last mywellness key sync on: 25/01/2016

LOW ACTIVE

0 MOVES

YOUR WEEKLY GOAL: 210 MOVES

Add activities and exercises New activity

Logbook

Aspirations determinate the way people live and move. Discover what makes you move

**All**

- MOVEMENT
- DAILY ACTIVITIES
- EXERCISES
- TRAINING PROGRAMME

**Workout done @mywellness.com**  
12 November 2015 12:00  
Your have completed the workout <<Free workout>> of 1 exercise - 20 min - 472 MOVES

**mywellness key**  
12 November 2015  
Your mywellness key has been synchronised. Your daily MOVES are 474

**WEEKLY MOVES**

•• DAILY GOAL ■ TRAINING PROGRAMME ■ EXERCISES ■ DAILY ACTIVITIES ■ MOVEMENT

◀ 07-13 OCTOBER 2013 ▶

OCTOBER 2013

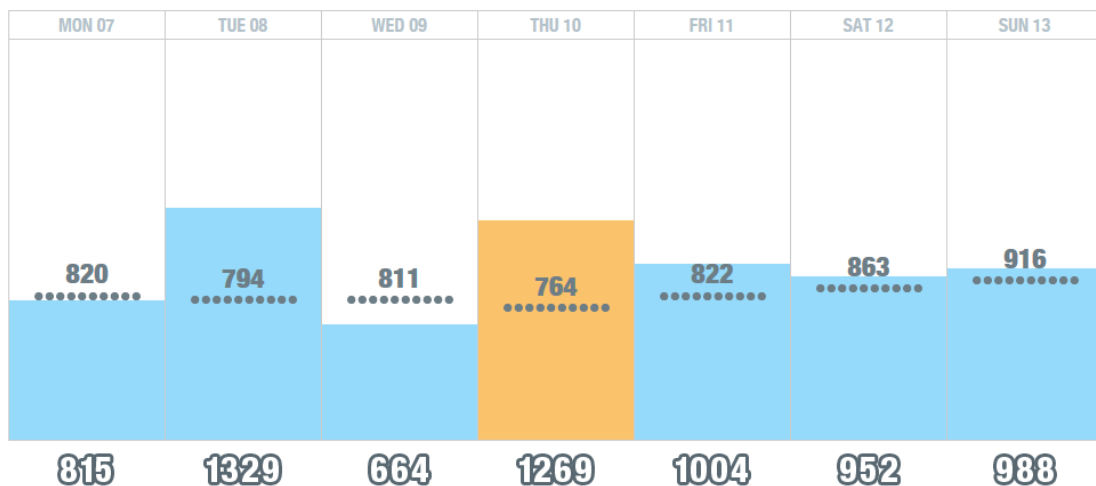

# RESULTS

Select the type of result to view

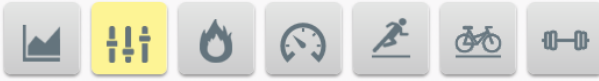

**HIGHEST NUMBER OF MOVES ON A BIKE**  
**472** MOVEs  
12 November 2015

## TIME IN INTENSITY

Time in intensity day by day

◀ 14-20 OCTOBER 2013 ▶

WEEKLY

MONTHLY

YEARLY

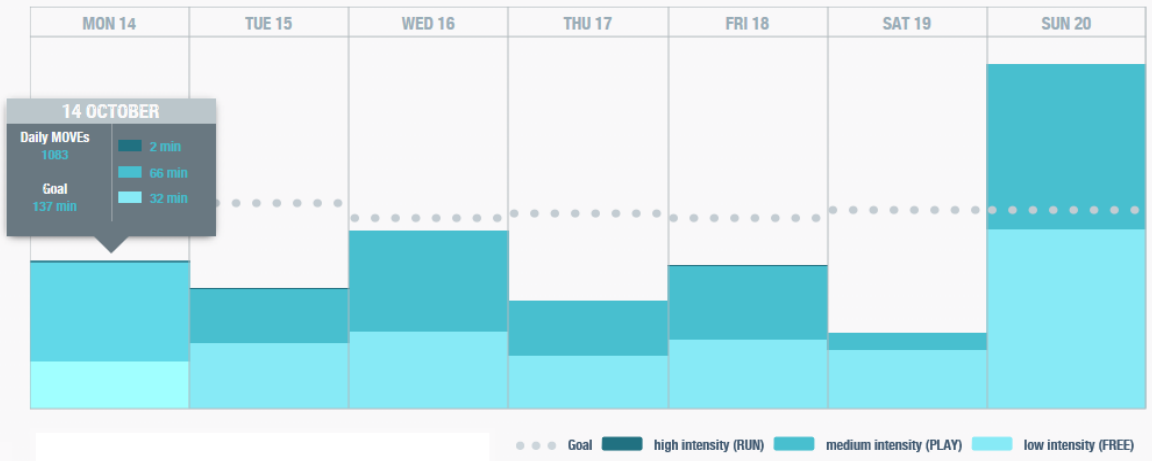

Supplement: jmir_v21i3e12374_app1.pdf [file jmir_v21i3e12374_app1.pdf]
